# Supplementary material for: Triple-Networked Hybrid Hydrogels Reinforced with Montmorillonite Clay and Graphene Nanoplatelets for Soft and Hard Tissue Regeneration
Source: MDPI journal article supplement (doi:10.3390/ijms232214158), 2022-11-16
Supplement: s1 [file s1]

## Structural analysis

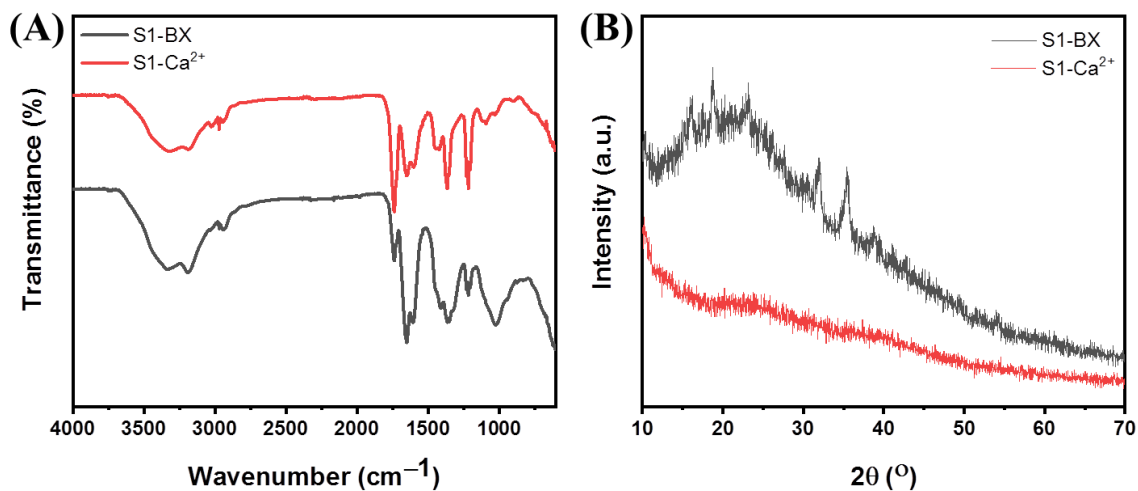

**Figure S1.** (A) FTIR spectra and (B) XRD pattern of borax-crosslinked and  $\text{Ca}^{2+}$  ions-crosslinked S1 hybrid hydrogels.

## Morphology

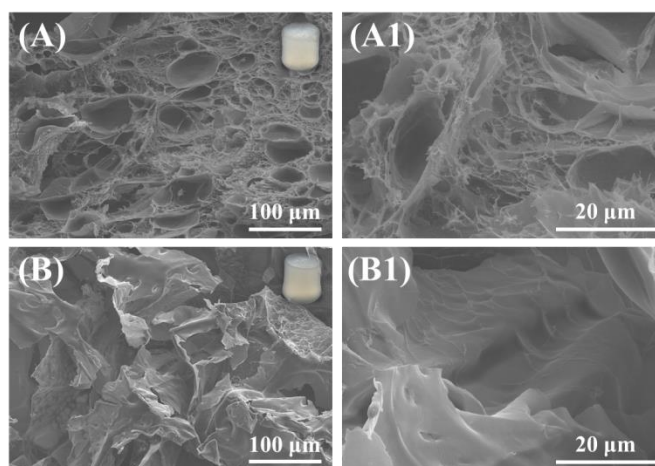

**Figure S2.** SEM images of (A-A1) borax-crosslinked and (B-B1)  $\text{Ca}^{2+}$  ions-crosslinked S1 hybrid hydrogels.

## Mechanical analysis

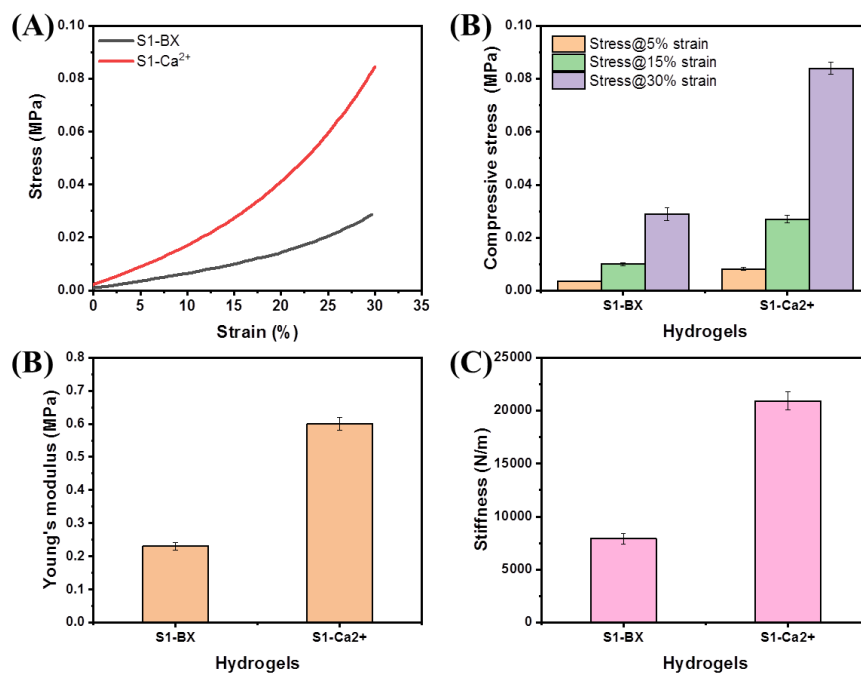

**Figure S3.** (A) Stress-strain curves, (B) compressive strength, (C) Young's modulus, and (D) stiffness values of borax-crosslinked and Ca<sup>2+</sup> ions-crosslinked S1 hybrid hydrogels.

## In-vitro Cytocompatibility

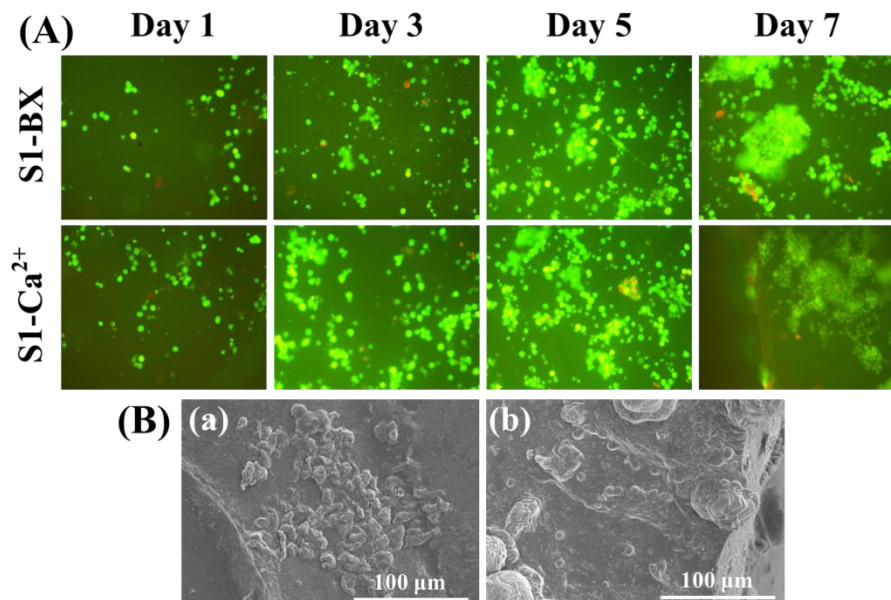

**Figure S4.** (A) Fluorescence images of live/dead assay of borax-crosslinked and Ca<sup>2+</sup> ions-crosslinked S1 hybrid hydrogels after 1, 3, 5, and 7 days of culture with fibroblast cells. (B) SEM images of borax-crosslinked and Ca<sup>2+</sup> ions-crosslinked S1 hybrid hydrogels after 7 days of culture with fibroblast cells.
